# Supplementary material
Source: PubMed Central journal article supplement (PMC4793598)
Supplement: hipj018247.ww1_default.pdf [file hipj018247.ww1_default.pdf]

**Table 1 ICD10 codes used to identify upper gastrointestinal bleed from hospital admissions or mortality data**

| <i>Code</i> | <i>Term</i>                                                                             |
|-------------|-----------------------------------------------------------------------------------------|
| I850        | Oesophageal varices with bleeding                                                       |
| K226        | Gastro-oesophageal laceration-bleed syndrome                                            |
| K250        | Gastric ulcer - Acute with bleed                                                        |
| K251        | Gastric ulcer - Acute with perforation                                                  |
| K252        | Gastric ulcer - Acute with both bleed and perforation                                   |
| K254        | Gastric ulcer - Chronic or unspecified with bleed                                       |
| K255        | Gastric ulcer - Chronic or unspecified with perforation                                 |
| K256        | Gastric ulcer - Chronic or unspecified with both bleed and perforation                  |
| K260        | Duodenal ulcer - Acute with bleed                                                       |
| K261        | Duodenal ulcer - Acute with perforation                                                 |
| K262        | Duodenal ulcer - Acute with both bleed and perforation                                  |
| K264        | Duodenal ulcer - Chronic or unspecified with bleed                                      |
| K265        | Duodenal ulcer - Chronic or unspecified with perforation                                |
| K266        | Duodenal ulcer - Chronic or unspecified with both bleed and perforation                 |
| K270        | Peptic ulcer, site unspecified - Acute with bleed                                       |
| K271        | Peptic ulcer, site unspecified - Acute with perforation                                 |
| K272        | Peptic ulcer, site unspecified - Acute with both bleed and perforation                  |
| K274        | Peptic ulcer, site unspecified - Chronic or unspecified with bleed                      |
| K275        | Peptic ulcer, site unspecified - Chronic or unspecified with perforation                |
| K276        | Peptic ulcer, site unspecified - Chronic or unspecified with both bleed and perforation |
| K280        | Gastrojejunal ulcer - Acute with bleed                                                  |
| K281        | Gastrojejunal ulcer - Acute with perforation                                            |
| K282        | Gastrojejunal ulcer - Acute with both bleed and perforation                             |
| K284        | Gastrojejunal ulcer - Chronic or unspecified with bleed                                 |
| K285        | Gastrojejunal ulcer - Chronic or unspecified with perforation                           |
| K286        | Gastrojejunal ulcer - Chronic or unspecified with both bleed and perforation            |
| K290        | Acute haemorrhagic gastritis                                                            |
| K920        | Haematemesis                                                                            |
| K921        | Melaena                                                                                 |
| K922        | Gastrointestinal bleed, unspecified                                                     |

**Table 2 ICD10 codes used to identify intracranial bleed from hospital admissions or mortality data**

| <i>Code</i> |                                                                |
|-------------|----------------------------------------------------------------|
| I60         | Subarachnoid bleed                                             |
| I600        | Subarachnoid bleed from carotid siphon and bifurcation         |
| I601        | Subarachnoid bleed from middle cerebral artery                 |
| I602        | Subarachnoid bleed from anterior communicating artery          |
| I603        | Subarachnoid bleed from posterior communicating artery         |
| I604        | Subarachnoid bleed from basilar artery                         |
| I605        | Subarachnoid bleed from vertebral artery                       |
| I606        | Subarachnoid bleed from other intracranial arteries            |
| I607        | Subarachnoid bleed from intracranial artery, unspecified       |
| I608        | Other subarachnoid bleed                                       |
| I609        | Subarachnoid bleed, unspecified                                |
| I61         | Intracerebral bleed                                            |
| I610        | Intracerebral bleed in hemisphere, subcortical                 |
| I611        | Intracerebral bleed in hemisphere, cortical                    |
| I612        | Intracerebral bleed in hemisphere, unspecified                 |
| I613        | Intracerebral bleed in brain stem                              |
| I614        | Intracerebral bleed in cerebellum                              |
| I615        | Intracerebral bleed, intraventricular                          |
| I616        | Intracerebral bleed, multiple localized                        |
| I618        | Other intracerebral bleed                                      |
| I619        | Intracerebral bleed, unspecified                               |
| I62         | Other nontraumatic intracranial bleed                          |
| I620        | Subdural bleed (acute)(nontraumatic)                           |
| I621        | Nontraumatic extradural bleed                                  |
| I629        | Intracranial bleed (nontraumatic), unspecified                 |
| S065        | Traumatic subdural bleed                                       |
| S0650       | Traumatic subdural bleed - without open intracranial wound     |
| S0651       | Traumatic subdural bleed - with open intracranial wound        |
| S066        | Traumatic subarachnoid bleed                                   |
| S0660       | Traumatic subarachnoid bleed - without open intracranial wound |
| S0661       | Traumatic subarachnoid bleed - with open intracranial wound    |
